# Supplementary material for: Geochemical evidence for the internal migration of gas condensate in a major unconventional tight petroleum system
Source: PubMed Central journal article supplement (PMC9106717; doi:10.1038/s41598-022-11963-6), 2022-05-13
Supplement: 41598_2022_11963_MOESM1_ESM.pdf [file 41598_2022_11963_MOESM1_ESM.pdf]

**Geochemical evidence for the internal migration of gas condensate in a major unconventional tight petroleum system**

James M. Wood, Jaime Cesar, Omid H. Ardakani, Arka Rudra, Hamed Sanei

Supplementary Information

**Table S1 Compound-specific carbon isotope ratio data of produced Montney gas samples**

| Geographic area   | Unique well identifier  | Latitude, toe of well | Longitude, toe of well | TVD, Top Montney, m | Elevation, Top Montney, m | TVD, toe of well, m | Elevation, toe of well, m | $\delta^{13}C1$ ‰ | $\delta^{13}C2$ ‰ | $\delta^{13}C3$ ‰ | $\delta^{13}nC4$ ‰ | $\delta^{13}nC5$ ‰ |
|-------------------|-------------------------|-----------------------|------------------------|---------------------|---------------------------|---------------------|---------------------------|-------------------|-------------------|-------------------|--------------------|--------------------|
| North Montney     | 200/A-083-B/094-B-16/00 | 56.82046              | -122.15757             | 1911.2              | -1030                     | 2047.2              | -1166                     | -43.73            | -29.5             | -26.53            | -25.92             | -26.02             |
| North Montney     | 200/D-057-G/094-B-16/00 | 56.88082              | -122.20487             | 1940.4              | -991.3                    | 2120.3              | -1171.2                   | -42.92            | -27.98            | -24.41            | -23.47             | -23.33             |
| North Montney     | 200/A-072-I/094-B-09/02 | 56.72866              | -122.01985             | 1768.1              | -997.9                    | 1955.8              | -1185.6                   | -44.6             | -30.1             | -28               | -27.7              | -27.4              |
| North Montney     | 200/A-015-A/094-B-16/00 | 56.76089              | -122.05165             | 1769.8              | -999.6                    | 1894.2              | -1124                     | -45.4             | -31               | -29.2             | -28.7              | -29.4              |
| North Montney     | 202/A-072-I/094-B-09/00 | 56.72862              | -122.01978             | 1768.1              | -997.9                    | 1783.6              | -1013.4                   | -46.1             | -33.7             | -31.3             | -30                | -30.1              |
| North Montney     | 200/D-053-H/094-B-09/00 | 56.63142              | -122.03062             | 2069.8              | -1176.2                   | 2075                | -1181.4                   | -47.45            | -34.71            | -31.98            | -30.53             | -30.06             |
| North Montney     | 200/C-044-I/094-B-16/03 | 56.95557              | -122.04841             | 1902.7              | -897.9                    | 2126.8              | -1122                     | -42.05            | -26.62            | -22.3             | -20.9              | -20.58             |
| North Montney     | 102/16-12-086-24W6/02   | 56.44721              | -121.64352             | 2015.6              | -1112.4                   | 2163                | -1259.8                   | -47.86            | -33.42            | -30.97            | -29.79             | -29.07             |
| North Montney     | 100/12-32-085-23W6/00   | 56.41466              | -121.6094              | 2015.7              | -1112.5                   | 2062.9              | -1159.7                   | -49.82            | -36.56            | -33.05            | -31.48             | -31.04             |
| North Montney     | 200/C-099-A/094-B-16/00 | 56.83035              | -122.10943             | 1936.9              | -989.2                    | 1964.2              | -1016.5                   | -45.45            | -32.75            | -30.21            | -29.08             |                    |
| North Montney     | 200/C-098-A/094-B-16/00 | 56.83218              | -122.10024             | 1938.6              | -990.9                    | 1956.2              | -1008.5                   | -45.42            | -32.22            | -29.84            | -28.99             |                    |
| Tower-Groundbirch | 102/01-13-081-18W6/00   | 56.01577              | -120.66411             | 2066.8              | -1224.1                   | 2184.7              | -1342                     | -46.7             | -36.7             | -34               | -32.6              | -32.6              |
| Tower-Groundbirch | 104/03-13-081-18W6/00   | 56.01502              | -120.68122             | 2047.7              | -1242.7                   | 2045.8              | -1240.8                   | -45.6             | -35.7             | -33.5             | -32.6              | -32                |
| Tower-Groundbirch | 100/14-23-080-17W6/00   | 55.95475              | -120.54594             | 2002.8              | -1283.1                   | 2119.2              | -1399.5                   | -44.3             | -32.1             | -31.5             | -31.2              | -30.5              |
| Tower-Groundbirch | 102/08-34-080-18W6/02   | 55.88124              | -120.74301             | 2131                | -1305.1                   | 2207.4              | -1381.5                   | -43.08            | -32.36            | -30.41            | -29.67             | -29.74             |
| Tower-Groundbirch | 100/01-21-080-18W6/00   | 55.94461              | -120.7434              | 2225.4              | -1374.6                   | 2350.7              | -1499.9                   | -45.1             | -31.9             | -29.6             | -29.6              | -29                |
| Tower-Groundbirch | 102/06-17-080-18W6/00   | 55.93091              | -120.78239             | 2246.8              | -1427.2                   | 2317.1              | -1497.5                   | -43.03            | -31.16            | -28.44            | -27.44             | -27.31             |
| Tower-Groundbirch | 100/08-11-080-19W6/00   | 55.91689              | -120.84789             | 2377.4              | -1477.8                   | 2412.9              | -1513.3                   | -41.6             | -29.5             | -26.9             | -24                | -23.2              |
| Tower-Groundbirch | 100/14-28-080-20W6/00   | 55.96757              | -121.06861             | 2370.1              | -1462.3                   | 2380.2              | -1472.4                   | -39.84            | -27.77            | -23.36            | -21.63             |                    |
| Tower-Groundbirch | 100/01-35-079-19W6/00   | 55.88618              | -120.84796             | 2390.8              | -1541                     | 2465.6              | -1615.8                   | -42.2             | -28.5             | -25.5             | -23.7              | -23.5              |
| Tower-Groundbirch | 100/06-32-079-20W6/00   | 55.88822              | -121.09354             | 2615.5              | -1718.3                   | 2656.7              | -1759.5                   | -39.21            | -26.2             | -20.16            | -18.13             |                    |
| Tower-Groundbirch | 100/04-35-078-20W6/00   | 55.79868              | -120.99557             | 2604.3              | -1855.1                   | 2651.9              | -1902.7                   | -40.9             | -25.5             | -21               | -19.6              | -18.4              |
| Tower-Groundbirch | 100/16-35-078-21W6/00   | 55.80802              | -121.13029             | 2756.6              | -1947.5                   | 3110.8              | -2301.7                   | -37.36            | -35.62            | -33.5             |                    |                    |
| Tower-Groundbirch | 100/16-02-078-22W6/00   | 55.73512              | -121.29015             | 3087.5              | -2358.1                   | 3365                | -2635.6                   | -34.91            | -40.83            | -35.5             |                    |                    |
| Gold Creek        | 100/05-24-068-05W6/02   | 54.89891              | -118.63013             | 2257.9              | -1585.6                   | 2360.8              | -1688.5                   | -46.66            | -34.3             | -30.67            | -30.42             | -30.32             |
| Gold Creek        | 100/06-15-063-07W6/02   | 54.44887              | -118.97156             | 3693.2              | -2564.9                   | 3787.1              | -2658.8                   | -42.17            | -21.86            | -20.95            | -21.21             |                    |
| Gold Creek        | 100/16-13-067-06W6/02   | 54.80551              | -118.76636             | 2558.5              | -1817.7                   | 2633.8              | -1893                     | -46.45            | -30.26            | -27.58            | -28.4              | -28.32             |

**Table S2 Compositional data of produced Montney gas samples**

| Geographic Area  | Unique well identifier  | He % | O2+Ar % | CO2 % | N2 %  | H2S % | C1 %  | C2 %  | C3, % | iC4 % | nC4 % | iC5 % | nC5 % | C6+ % | Wetness % | $\Sigma(C2-C5)/\Sigma(C1-C5)$ | $C1/(C2+C3)$ |
|------------------|-------------------------|------|---------|-------|-------|-------|-------|-------|-------|-------|-------|-------|-------|-------|-----------|-------------------------------|--------------|
| North Montney    | 200/A-083-B/094-B-16/00 |      |         | 0.14  | 0.22  |       | 85.69 | 8.93  | 2.78  | 0.68  | 0.76  | 0.28  | 0.2   | 0.27  |           | 13.72                         | 7.32         |
| North Montney    | 200/D-057-G/094-B-16/00 |      |         | 0.22  | 0.32  |       | 88.5  | 7.62  | 1.95  | 0.49  | 0.44  | 0.16  | 0.09  | 0.15  |           | 10.83                         | 9.25         |
| North Montney    | 200/A-072-I/094-B-09/02 |      | 0.91    | 0.08  | 2.53  |       | 78.2  | 10.75 | 4.39  | 0.95  | 1.3   | 0.36  | 0.28  | 0.25  |           | 18.74                         | 5.17         |
| North Montney    | 200/A-015-A/094-B-16/00 |      | 0.76    | 0.09  | 1.75  |       | 80.55 | 10.44 | 3.89  | 0.76  | 1.07  | 0.27  | 0.22  | 0.2   |           | 17.13                         | 5.62         |
| North Montney    | 202/A-072-I/094-B-09/00 |      | 0.89    | 0.11  | 2.34  |       | 78.62 | 11.13 | 4.39  | 0.72  | 1.13  | 0.24  | 0.24  | 0.2   |           | 18.5                          | 5.07         |
| North Montney    | 200/D-053-H/094-B-09/00 |      |         | 0.12  | 0.3   |       | 79.36 | 12.15 | 5.1   | 0.77  | 1.31  | 0.27  | 0.28  | 0.31  |           | 20.03                         | 4.6          |
| North Montney    | 200/C-044-I/094-B-16/03 |      | 0.11    | 0.23  | 0.59  |       | 90.05 | 6.02  | 1.62  | 0.51  | 0.4   | 0.2   | 0.09  | 0.18  |           | 8.94                          | 11.79        |
| North Montney    | 102/16-12-086-24W6/02   | 0.01 |         | 0.09  | 33.27 |       | 51.49 | 7.98  | 3.99  | 0.61  | 1.37  | 0.37  | 0.35  | 0.47  |           | 22.18                         | 4.3          |
| North Montney    | 100/12-32-085-23W6/00   | 0.01 | 0.27    | 0.2   | 37.71 |       | 47.97 | 7.55  | 3.58  | 0.5   | 1.13  | 0.27  | 0.35  | 0.46  |           | 21.81                         | 4.31         |
| North Montney    | 200/C-099-A/094-B-16/00 |      | 3.11    | 0.13  | 10.37 |       | 71.15 | 9.64  | 3.61  | 0.61  | 0.87  | 0.2   | 0.18  | 0.14  |           | 17.51                         | 5.37         |
| North Montney    | 200/C-098-A/094-B-16/00 |      | 0.05    | 0.13  | 0.25  |       | 81.66 | 11.14 | 4.16  | 0.75  | 1.07  | 0.28  | 0.25  | 0.26  |           | 17.77                         | 5.34         |
| Tower-Groudbirch | 102/01-13-081-18W6/00   |      | 0.16    | 0.18  | 0.06  |       | 83.32 | 9.95  | 4.17  | 0.52  | 0.98  | 0.19  | 0.22  | 0.25  |           | 16.13                         | 5.9          |
| Tower-Groudbirch | 104/03-13-081-18W6/00   |      |         | 0.14  | 0.04  |       | 83.05 | 10.08 | 4.46  | 0.61  | 1.11  | 0.19  | 0.21  | 0.11  |           | 16.71                         | 5.71         |
| Tower-Groudbirch | 100/14-23-080-17W6/00   |      |         | 0.06  | 0.08  |       | 83.85 | 10.72 | 3.66  | 0.49  | 0.69  | 0.13  | 0.14  | 0.2   |           | 15.87                         | 5.83         |
| Tower-Groudbirch | 102/08-34-080-18W6/02   |      |         | 0.12  | 0.21  |       | 85.04 | 9.12  | 3.31  | 0.57  | 0.91  | 0.22  | 0.25  | 0.25  |           | 14.46                         | 6.84         |
| Tower-Groudbirch | 100/01-21-080-18W6/00   |      | 0.07    | 0.12  | 0.03  |       | 86.08 | 8.8   | 3.07  | 0.53  | 0.77  | 0.18  | 0.19  | 0.16  |           | 13.59                         | 7.25         |
| Tower-Groudbirch | 102/06-17-080-18W6/00   |      |         | 0.16  | 2.84  |       | 82.03 | 9.01  | 2.96  | 0.54  | 0.76  | 0.23  | 0.24  | 0.46  |           | 14.35                         | 6.85         |
| Tower-Groudbirch | 100/08-11-080-19W6/00   |      | 0.07    | 0.24  | 0.03  |       | 90.59 | 6.39  | 1.72  | 0.34  | 0.36  | 0.1   | 0.08  | 0.08  |           | 9.03                          | 11.17        |
| Tower-Groudbirch | 100/14-28-080-20W6/00   |      |         | 0.26  | 0.47  |       | 92.55 | 4.9   | 1.11  | 0.25  | 0.21  | 0.06  | 0.04  | 0.07  |           | 6.63                          | 15.4         |
| Tower-Groudbirch | 100/01-35-079-19W6/00   |      | 0.26    | 0.21  | 0.1   |       | 89.53 | 7.11  | 1.86  | 0.35  | 0.36  | 0.09  | 0.07  | 0.07  |           | 9.9                           | 9.98         |
| Tower-Groudbirch | 100/06-32-079-20W6/00   |      |         | 0.42  | 0.17  |       | 94.96 | 3.61  | 0.56  | 0.12  | 0.08  | 0.02  | 0.01  | 0.03  |           | 4.43                          | 22.78        |
| Tower-Groudbirch | 100/04-35-078-20W6/00   |      | 0.06    | 0.31  | 0.04  |       | 94.23 | 4.27  | 0.78  | 0.14  | 0.11  | 0.02  | 0.01  | 0.01  |           | 5.36                          | 18.64        |
| Tower-Groudbirch | 100/16-35-078-21W6/00   |      | 0.03    | 2.42  | 1.44  |       | 95.18 | 0.86  | 0.05  |       |       |       |       |       |           | 0.94                          | 105.03       |
| Tower-Groudbirch | 100/16-02-078-22W6/00   |      | 0.27    | 5.15  | 1.24  |       | 92.64 | 0.61  | 0.06  |       |       |       |       | 0.01  |           | 0.72                          | 137.55       |
| Gold Creek       | 100/05-24-068-05W6/02   |      | 1.86    | 0.45  | 10.31 |       | 73.45 | 7.86  | 3.71  | 0.49  | 1.17  | 0.24  | 0.26  | 0.2   |           | 15.75                         | 6.35         |
| Gold Creek       | 100/06-15-063-07W6/02   |      | 0.05    | 0.33  | 0.39  | 13.22 | 75.26 | 4.64  | 2.23  | 0.99  | 1.05  | 0.67  | 0.45  | 0.73  |           | 11.76                         | 10.95        |
| Gold Creek       | 100/16-13-067-06W6/02   |      |         | 0.27  | 10.3  |       | 75.51 | 7.87  | 3.5   | 0.56  | 1.18  | 0.27  | 0.28  | 0.26  |           | 15.32                         | 6.64         |

**Table S3 Compound-specific carbon isotope ratio data of produced Montney hydrocarbon liquid samples**

| Geographic area                     | North Montney           | North Montney           | North Montney           | Gold Creek            |
|-------------------------------------|-------------------------|-------------------------|-------------------------|-----------------------|
| Unique well identifier              | 200/A-072-I/094-B-09/02 | 200/A-015-A/094-B-16/00 | 202/A-072-I/094-B-09/00 | 100/05-24-068-05W6/02 |
| Latitude, toe of well               | 56.72866                | 56.76089                | 56.72862                | 54.89891              |
| Longitude, toe of well              | -122.01985              | -122.05165              | -122.01978              | -118.63013            |
| True vertical depth, top Montney, m | 1768.1                  | 1769.8                  | 1768.1                  | 2257.9                |
| Subsea elevation, top Montney, m    | -997.9                  | -999.6                  | -997.9                  | -1585.6               |
| True vertical depth, toe of well, m | 1955.8                  | 1894.2                  | 1783.6                  | 2360.8                |
| Subsea elevation, toe of well, m    | -1185.6                 | -1124                   | -1013.4                 | -1688.5               |
| $\delta^{13}\text{C}$ nC4           | -27.9                   | -29.3                   | -30.7                   |                       |
| $\delta^{13}\text{C}$ nC5           | -27.6                   | -29.7                   | -30.6                   |                       |
| $\delta^{13}\text{C}$ nC6           | -28.2                   | -30.9                   | -31.5                   |                       |
| $\delta^{13}\text{C}$ nC7           | -28.2                   | -31.6                   | -31.8                   |                       |
| $\delta^{13}\text{C}$ nC8           | -28                     | -31.8                   | -31.6                   |                       |
| $\delta^{13}\text{C}$ nC9           | -28                     | -32.4                   | -32.1                   | -31.4                 |
| $\delta^{13}\text{C}$ C10           | -28                     | -32.5                   | -32.2                   | -31.9                 |
| $\delta^{13}\text{C}$ C11           | -28.8                   | -33.1                   | -32.5                   | -31.9                 |
| $\delta^{13}\text{C}$ C12           | -28.2                   | -33                     | -32.5                   | -32.1                 |
| $\delta^{13}\text{C}$ C13           | -28.1                   | -33.1                   | -32.5                   | -32.3                 |
| $\delta^{13}\text{C}$ C14           | -27.7                   | -33.1                   | -32.6                   | -32.3                 |
| $\delta^{13}\text{C}$ C15           | -27.9                   | -33                     | -32.3                   | -32.2                 |
| $\delta^{13}\text{C}$ C16           | -28.2                   | -33.6                   | -32.6                   | -32.3                 |
| $\delta^{13}\text{C}$ C17           | -27.9                   | -33.4                   | -33                     | -32.1                 |
| $\delta^{13}\text{C}$ C18           | -28.2                   | -33.6                   | -32.8                   | -32.7                 |
| $\delta^{13}\text{C}$ C19           | -27.3                   | -32.8                   | -31.7                   | -32                   |
| $\delta^{13}\text{C}$ C20           | -28.1                   | -33                     | -32.6                   | -32.1                 |
| $\delta^{13}\text{C}$ C21           | -28.4                   | -33.7                   | -32.9                   | -32.3                 |
| $\delta^{13}\text{C}$ C22           | -28.5                   | -33.4                   | -32.7                   | -32                   |
| $\delta^{13}\text{C}$ C23           | -28.3                   | -33.6                   | -32.9                   | -32                   |
| $\delta^{13}\text{C}$ C24           | -28.1                   |                         | -32.6                   | -31.8                 |
| $\delta^{13}\text{C}$ C25           | -27.4                   |                         | -32.2                   | -31.4                 |
| $\delta^{13}\text{C}$ C26           | -26.9                   |                         | -33.2                   | -32                   |
| $\delta^{13}\text{C}$ C27           | -27.1                   |                         |                         | -31.8                 |
| $\delta^{13}\text{C}$ C28           |                         |                         |                         | -31.2                 |
| $\delta^{13}\text{C}$ C29           |                         |                         |                         | -32                   |
| $\delta^{13}\text{C}$ C30           |                         |                         |                         | -31.7                 |
| $\delta^{13}\text{C}$ C31           |                         |                         |                         | -31.2                 |
| $\delta^{13}\text{C}$ C32           |                         |                         |                         | -31.4                 |
| $\delta^{13}\text{C}$ C33           |                         |                         |                         | -30.5                 |

**Table S4 Compositional data for Montney recombination PVT samples**

| Geographic area                     |       | North Montney         | North Montney           | Tower                 | Tower                 |
|-------------------------------------|-------|-----------------------|-------------------------|-----------------------|-----------------------|
| Unique well identifier              |       | 100/07-35-086-23W6/02 | 200/A-006-D/094-A-13/02 | 100/12-04-082-18W6/02 | 100/16-23-081-18W6/00 |
| Latitude, toe of well               |       | 56.500715             | 56.751282               | 56.082582             | 56.040925             |
| Longitude, toe of well              |       | -121.515882           | -121.942955             | -120.764407           | -120.690455           |
| True vertical depth, top Montney, m |       | 1806.9                | 2000                    | 1858.1                | 2027.4                |
| Subsea elevation, top Montney, m    |       | -1033.1               | -1037.7                 | -1140.8               | -1185.8               |
| True vertical depth, toe of well, m |       | 1821.8                | 2018                    | 1892.3                | 2035                  |
| Subsea elevation, toe of well, m    |       | -1048                 | -1055.7                 | -1175                 | -1193.4               |
| Hydrogen                            | H     |                       |                         |                       | 0.0001                |
| Nitrogen                            | N2    | 0.0039                | 0.0031                  | 0.0022                | 0.0014                |
| Carbon Dioxide                      | CO2   | 0.0045                | 0.001                   | 0.0007                | 0.002                 |
| Hydrogen Sulfide                    | H2S   | 0.0001                |                         |                       |                       |
| Methane                             | C1    | 0.5032                | 0.6434                  | 0.3961                | 0.5452                |
| Ethane                              | C2    | 0.1109                | 0.1118                  | 0.101                 | 0.0958                |
| Propane                             | C3    | 0.0808                | 0.0648                  | 0.0877                | 0.0643                |
| i-Butane                            | i-C4  | 0.0131                | 0.0153                  | 0.0134                | 0.0119                |
| n-Butane                            | n-C4  | 0.0341                | 0.0214                  | 0.0413                | 0.0307                |
| i-Pentane                           | i-C5  | 0.0119                | 0.0093                  | 0.0152                | 0.0101                |
| n-Pentane                           | n-C5  | 0.0171                | 0.0123                  | 0.0242                | 0.0158                |
| Hexanes                             | C6    | 0.0247                | 0.017                   | 0.0286                | 0.0196                |
| Heptanes                            | C7    | 0.0198                | 0.0122                  | 0.0274                | 0.0175                |
| Octanes                             | C8    | 0.0209                | 0.0125                  | 0.0285                | 0.0193                |
| Nonanes                             | C9    | 0.0182                | 0.0104                  | 0.0246                | 0.0175                |
| Decanes                             | C10   | 0.0143                | 0.0078                  | 0.0211                | 0.0149                |
| Undecanes                           | C11   | 0.0131                | 0.0065                  | 0.0186                | 0.0134                |
| Dodecanes                           | C12   | 0.0101                | 0.0049                  | 0.0148                | 0.0111                |
| Tridecanes                          | C13   | 0.0105                | 0.0051                  | 0.0147                | 0.0111                |
| Tetradecanes                        | C14   | 0.0083                | 0.0039                  | 0.0112                | 0.0085                |
| Pentadecanes                        | C15   | 0.0065                | 0.0032                  | 0.0105                | 0.0073                |
| Hexadecanes                         | C16   | 0.0051                | 0.0024                  | 0.0078                | 0.0057                |
| Heptadecanes                        | C17   | 0.0045                | 0.0022                  | 0.0069                | 0.0053                |
| Octadecanes                         | C18   | 0.0044                | 0.0021                  | 0.0066                | 0.005                 |
| Nonadecanes                         | C19   | 0.0039                | 0.0018                  | 0.0059                | 0.0044                |
| Eicosanes                           | C20   | 0.003                 | 0.0013                  | 0.0045                | 0.0034                |
| Heneicosanes                        | C21   | 0.0026                | 0.0012                  | 0.0041                | 0.003                 |
| Docosanes                           | C22   | 0.0023                | 0.001                   | 0.0036                | 0.0027                |
| Tricosanes                          | C23   | 0.002                 | 0.0009                  | 0.0032                | 0.0023                |
| Tetracosanes                        | C24   | 0.0018                | 0.0008                  | 0.0028                | 0.002                 |
| Pentacosanes                        | C25   | 0.0017                | 0.0007                  | 0.0028                | 0.002                 |
| Hexacosanes                         | C26   | 0.0014                | 0.0006                  | 0.0021                | 0.0016                |
| Heptacosanes                        | C27   | 0.0013                | 0.0005                  | 0.0022                | 0.0014                |
| Octacosanes                         | C28   | 0.0011                | 0.0004                  | 0.002                 | 0.0013                |
| Nonacosanes                         | C29   | 0.001                 | 0.0004                  | 0.0017                | 0.0011                |
| Tricontanes Plus                    | C30+  | 0.0117                | 0.0028                  | 0.0179                | 0.0116                |
| Cyclopentane                        | C5H10 | 0.0012                | 0.0005                  | 0.0026                | 0.0001                |
| Methylcyclopentane                  | C6H12 | 0.0034                | 0.0018                  | 0.007                 | 0.0049                |
| Cyclohexane                         | C6H12 | 0.0039                | 0.0024                  | 0.0074                | 0.005                 |
| Methylcyclohexane                   | C7H14 | 0.0062                | 0.0042                  | 0.0122                | 0.0091                |
| Benzene                             | C6H6  | 0.0014                | 0.0008                  | 0.0012                | 0.0008                |
| Toluene                             | C7H8  | 0.0027                | 0.0021                  | 0.0032                | 0.0022                |
| Ethylbenzene & p,m-Xylene           | C8H10 | 0.0025                | 0.0015                  | 0.006                 | 0.004                 |
| o-Xylene                            | C8H10 | 0.0017                | 0.0008                  | 0.0017                | 0.0017                |
| 1,2,4-Trimethylbenzene              | C9H12 | 0.003                 | 0.0011                  | 0.0028                | 0.0019                |
